# Supplementary material for: Two-dimensional coordination polymers with high proton conductivity and ultrafast highly efficient molecular sieving constructed by the structural inductive effect
Source: Royal Society of Chemistry journal article supplement (doi:10.1039/d2dt00364c), 2022-01-01
Supplement: d2dt00364c1.pdf [file d2dt00364c1.pdf]

*Supporting Information*

**Two-dimensional coordination polymers constructed based on SIE  
with high proton conductivity and ultrafast highly-efficient  
molecular sieving**

Lian Zhou,<sup>a, b</sup> † Mingming Ruan,<sup>c</sup> † Wei Meng,<sup>a</sup> Qianping Wang,<sup>a, b</sup> Bo Liu,<sup>\*, d</sup> Xiaopeng Xuan,<sup>\*, c</sup> Jun Zhang,<sup>\*, a, b</sup>

---

<sup>a</sup> State Key Laboratory of Plateau Ecology and Agriculture, New Energy Photovoltaic Industry Research Center, Qinghai University, Xining 810016, P. R. China. Email: [zhangjun@ahjzu.edu.cn](mailto:zhangjun@ahjzu.edu.cn) (J. Zhang).

<sup>b</sup> School of Materials and Chemical Engineering, Anhui Jianzhu University, Hefei 230601, P. R. China.

<sup>c</sup> School of Chemistry and Chemical Engineering, Key Laboratory of Green Chemical Media and Reactions, Ministry of Education, Collaborative Innovation Center of Henan Province for Green Manufacturing of Fine Chemicals, Henan Normal University, Xinxiang, Henan 453007, P. R. China. Email: [xuanxp.chem@htu.edu.cn](mailto:xuanxp.chem@htu.edu.cn) (X. Xuan).

<sup>d</sup> Department of Chemistry, University of Science and Technology of China, Hefei, Anhui 230026, P. R. China. Email: [liuchem@ustc.edu.cn](mailto:liuchem@ustc.edu.cn) (B. Liu).

† These authors contributed equally to this work.

## 1. Experiment section

### 1.1 Measurements and apparatus

All the reagents are commercially obtained and directly used without further purification. The Powder X-ray diffraction (PXRD) was carried out on a Bruker D8 (40kV, 40 mA) advanced diffractometer with Cu-K $\alpha$  radiation ( $\lambda=1.5418 \text{ \AA}$ ). IR spectra were collected on a NEXUS 870 (Nicolet) infrared spectrometer from 400 to 4000  $\text{cm}^{-1}$  by a KBr pellet with a resolution of 4  $\text{cm}^{-1}$ . Thermogravimetric (TG) analysis data were recorded on a Netzsch STA 409 PC analyzer at a heating rate of 10  $^{\circ}\text{C}\cdot\text{min}^{-1}$  under  $\text{N}_2$  atmosphere. The *in-situ* various temperature UV-Vis diffuse reflectance spectra were recorded in the range of 200-800 nm with the integrated sphere accessory using  $\text{BaSO}_4$  as the reference on a UV-Vis diffuse reflectance spectrometer (UV-3700, Shimadzu, Japan). The determination of the proton conductivity was carried out using a Gamry Reference 600+ electrochemical workstation.

### 1.2 Preparation

The solution of  $\text{Cu}(\text{NO}_3)_2\cdot 3\text{H}_2\text{O}$  (0.048 g, 0.20 mmol) in 1 mL deionized water was added to the solution of  $\text{H}_4\text{BTC}$  (0.025 g, 0.10 mmol), TTP (0.044 g, 0.10 mmol) in 4 mL DMF, then 7 drops of 6 mol/L HCl aqueous were added to adjust the pH value to *ca.* 1. The obtained mixture was transferred to a glass tube and sealed in a stainless steel reaction vessel, then heated for about 3 days at 60  $^{\circ}\text{C}$ . After being cooling back to room temperature, the solution containing blue crystals was filtered, washed with water and alcohol three times respectively, and dried in the air. Finally, the obtained **HNNU-1 $\alpha$**  is 0.064 g with a yield of 71.1 % based on  $\text{H}_4\text{BTC}$ . Elemental analysis (EA): Calcd. H: 2.90%; C: 26.59%. Exp.: H: 3.11%; C: 25.47%. **HNNU-1 $\beta$**  and **HNNU-1 $\gamma$**  were prepared under the same conditions with the different inorganic acids (HBr for **HNNU-1 $\beta$**  and HI for **HNNU-1 $\gamma$** ). EA for **HNNU-1 $\beta$** : Calcd. H: 2.63%; C: 26.13%. Exp.: H: 2.70%; C: 26.01%, EA for **HNNU-1 $\gamma$** : Calcd. H: 2.39%; C: 23.71%. Exp.: H: 2.18%; C: 23.58%. The FT-IR spectra of **HNNU-1 $\alpha$**  to **1 $\beta$**  are almost the same positions and intensities for the observed bands (Figure S18). IR bands (KBr,  $\text{cm}^{-1}$ ) 3404 (w), 1605 (s), 1556 (s), 1495 (s), 1414 (s), 1359 (s), 1317 (s), 1185 (m), 1138 (m), 937 (w), 902

(w), 861 (m), 813 (s), 757 (m), 691 (s), 645 (s), 525 (s), 449 (s).

### 1.3 Crystallographic Data

Single-crystal X-ray diffraction data of the as-synthesized CPs were collected at 293(2) K on a Bruker SMART APEX II diffractometer equipped with a CCD area-detector using graphite-monochromated Mo/K $\alpha$  radiation (0.71073 Å). The data reduction and absorption correction were executed using the SAINT<sup>1</sup> and SADABS<sup>2</sup> subprograms under APEX3<sup>3</sup> program package, respectively. The structure was solved using the dual space method using SHELXT-2018<sup>4</sup> routine and refined by SHELXL-2018<sup>5</sup> routine with full-matrix least-squares on F<sup>2</sup> under Olex2<sup>6</sup> software package. During the final refinement circles, all non-hydrogen atoms were refined anisotropically, while all the hydrogen atoms were produced by geometrical calculations and refined isotropically by using the riding model. Crystallographic data have been deposited in the Cambridge Crystallographic Data Centre (CCDC No. 1916820, 2132955, 2132956). Summary of structural parameters and crystal data for **HNNU-1 $\alpha$**  to **1 $\gamma$**  were given in Table S1 – S6.

### 1.4 Preparation of the laminates for HNNU-1 $\alpha$

10.1 mg **HNNU-1 $\alpha$**  was firstly heated at 170 °C for 2 h, then soaked in 60 mL ethanol using a 100 mL beaker and placed in the strong ultrasonic environment for about 40 min. 5 mL suspension was transferred to a disposable plastic injector, then passed through the filter nod with a pore size of 0.22  $\mu$ m and radii of *ca.* 0.8 cm. The laminates were formed and tightened on the filter membrane as support background, then applied to filter the water containing ions or molecules. The sectional area and height of laminate are *ca.* 2.0 cm<sup>2</sup> and *ca.* 216  $\mu$ m, respectively.

### 1.5 Proton conductivity measurement

The measurement of proton conductivity was similar to our previous work. Briefly, the as-synthesized sample was finely ground, then compressed into a pellet with a diameter of 6.35 mm. The Gamry Reference 600+ electrochemical workstation and the conventional three-electrode methods were used to measure the AC impedance spectra

at various temperatures and relative humidity (RH), respectively. The RH was adjusted by the saturated salt solutions.

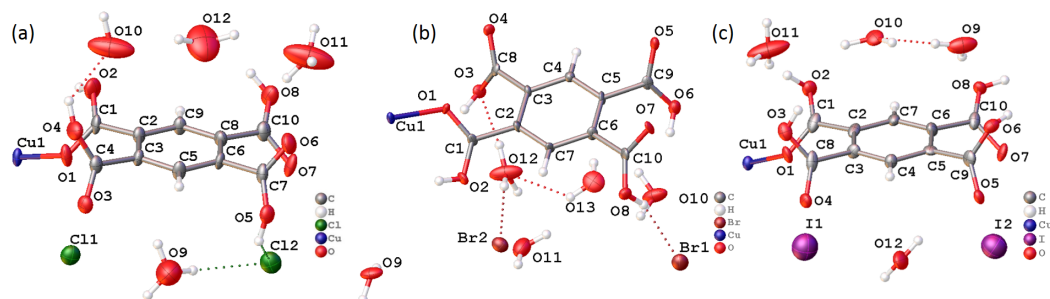

Figure S1. Asymmetric unit with 50 % probability level of HNNU-1 $\alpha$  (a), HNNU-1 $\beta$  (b) and HNNU-1 $\gamma$  (c).

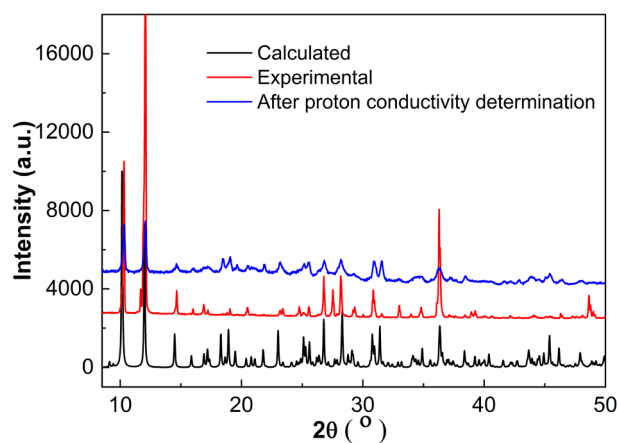

Fig. S2 PXRD of HNNU-1 $\alpha$ .

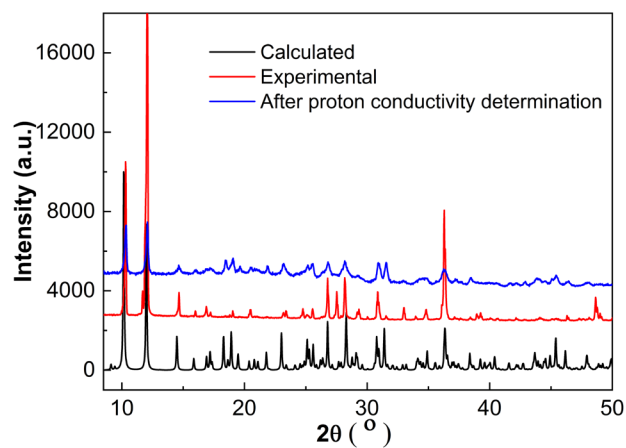

Fig. S3 PXRD of HNNU-1 $\beta$ .

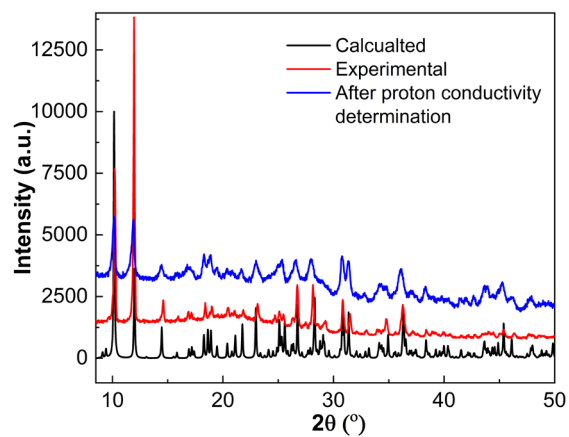

Fig. S4 PXRD of HNNU-1 $\gamma$ .

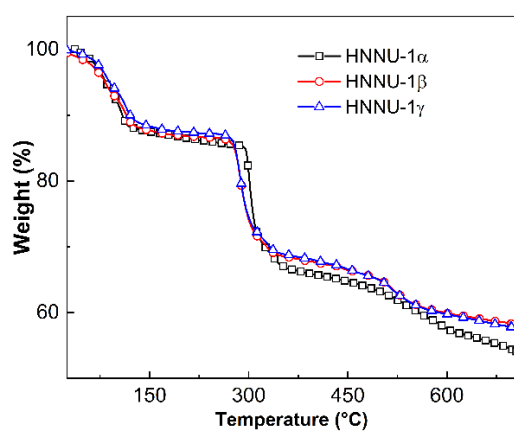

Figure S5. The TG plot of HNNU-1 $\alpha$ , 1 $\beta$ , and 1 $\gamma$ .

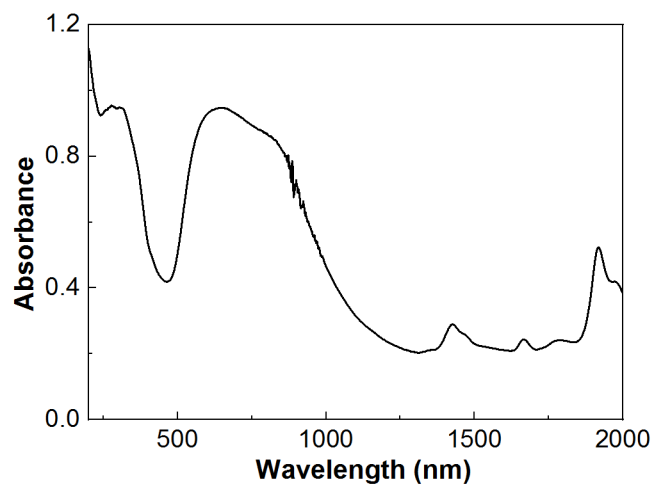

Figure S6. The UV-vis diffuse reflectance spectrum of HNNU-1 $\alpha$  at room temperature.

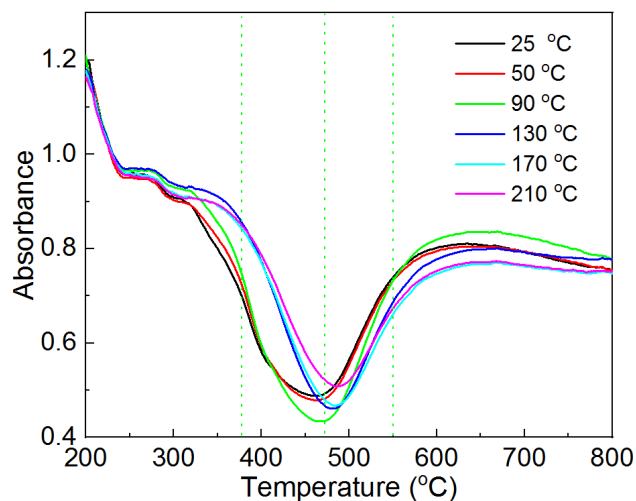

Fig. S7 The *in situ* UV-vis diffuse reflectance spectra of HNNU-1 $\alpha$  at different temperatures.

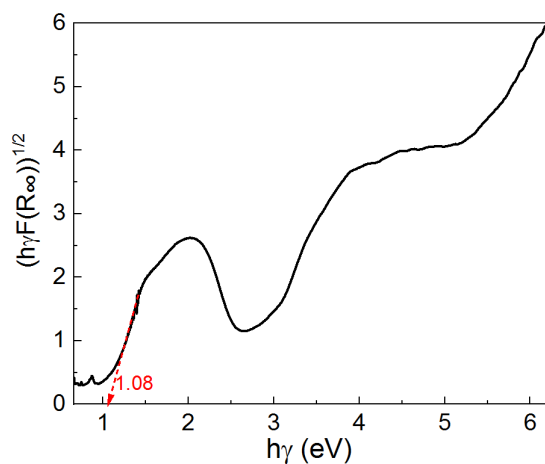

Figure S8. Tauc plots of the transformed Kubelka-Munk function versus the light energy for HNNU-1 $\alpha$  at room temperature.

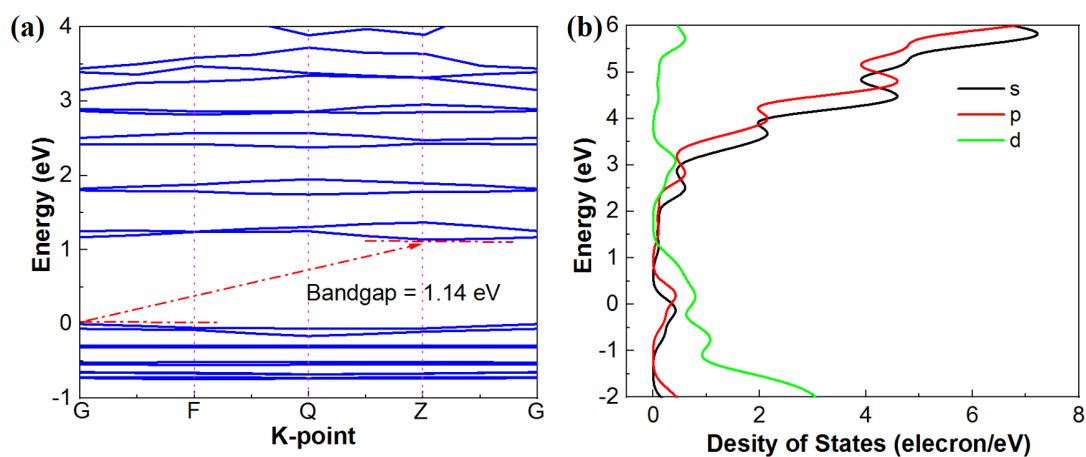

Figure S9. The theoretical calculations on the bandgap (a) and orbital compositions (b) of HNNU-1 $\alpha$ .

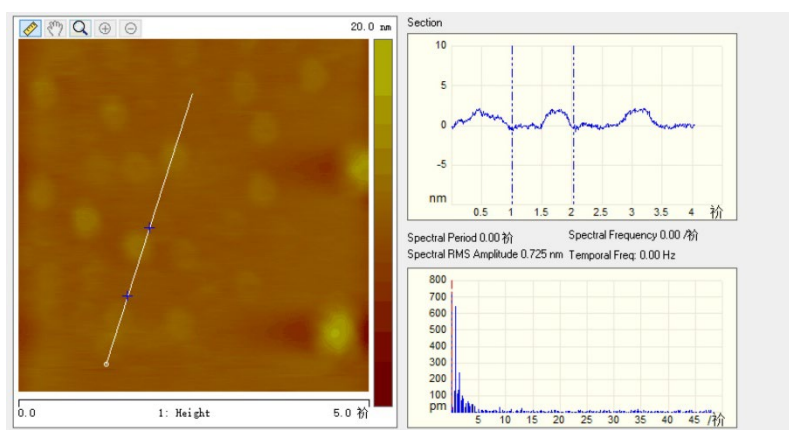

Fig. S10 The lamella thickness of **HNNU-1 $\alpha$**  recorded by AFM.

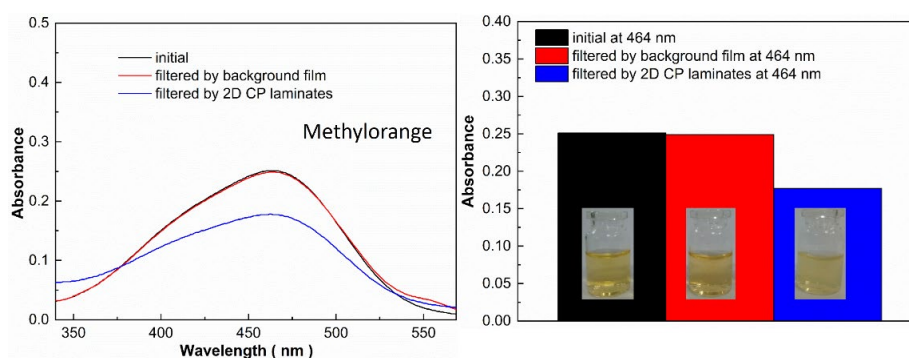

Fig. S11 The UV-Vis absorption spectra of the filtrate by the laminates of **HNNU-1 $\alpha$**  for the aqueous solution of methyl orange.

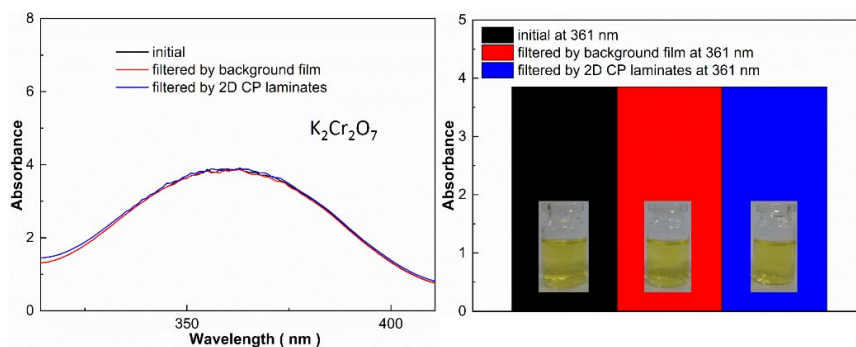

Fig. S12 The UV-Vis absorption spectra of the filtrate by the laminates of **HNNU-1 $\alpha$**  for the aqueous solution of  $K_2Cr_2O_7$ .

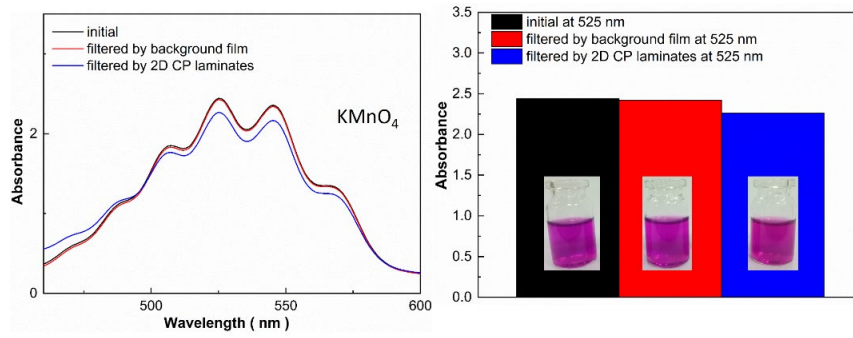

Fig. S13 The UV-Vis absorption spectra of the filtrate by the laminates of **HNNU-1 $\alpha$**  for the aqueous solution of  $\text{KMnO}_4$ .

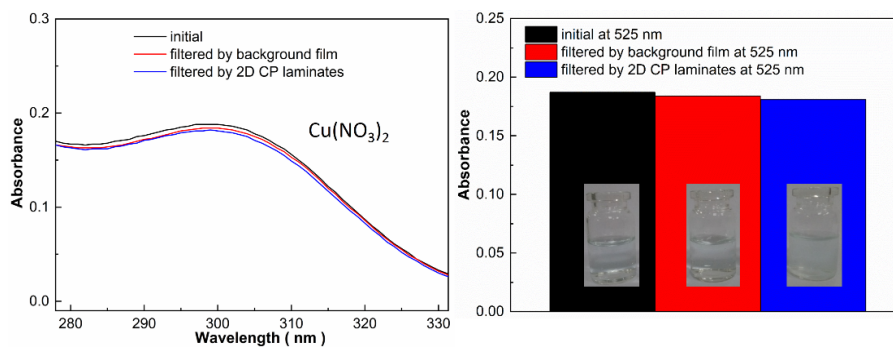

Fig. S14 The UV-Vis absorption spectra of the filtrate by the laminates of **HNNU-1 $\alpha$**  for aqueous solution for  $\text{Cu}(\text{NO}_3)_2$ .

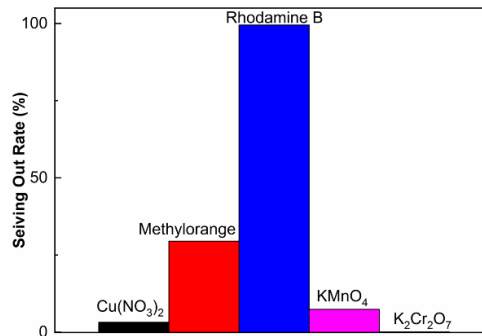

Fig. S15 The sieving out rate by the laminates of **HNNU-1 $\alpha$**  for the aqueous solution containing rhodamine B, methyl orange,  $\text{KMnO}_4$ ,  $\text{K}_2\text{Cr}_2\text{O}_7$ , and  $\text{Cu}(\text{NO}_3)_2$ .



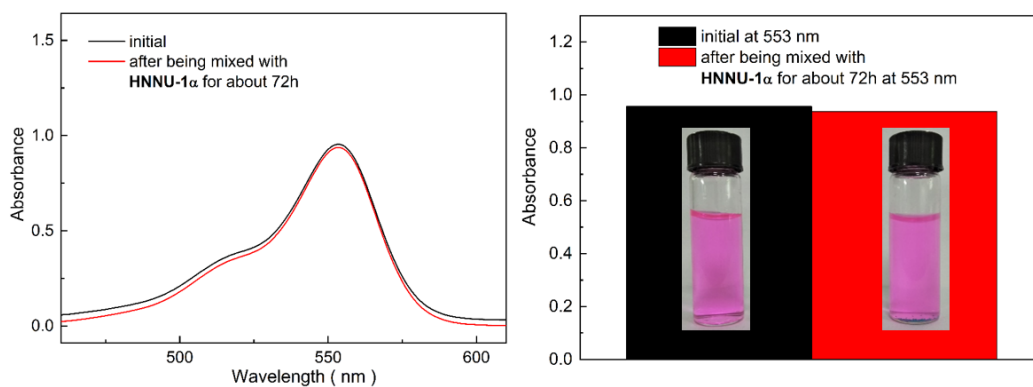

Fig. S16 The UV-Vis absorption spectra of initial and mixed with **HNNU-1 $\alpha$**  for rhodamine B.

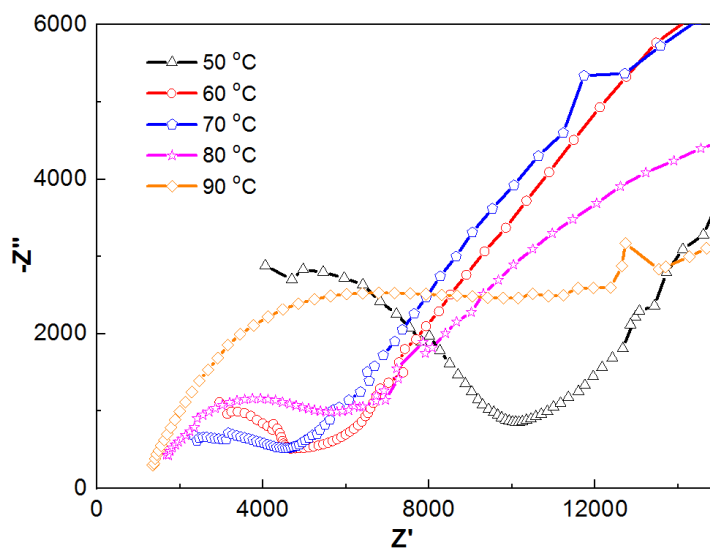

Fig. S17 Nyquist plots of **HNNU-1 $\beta$** .

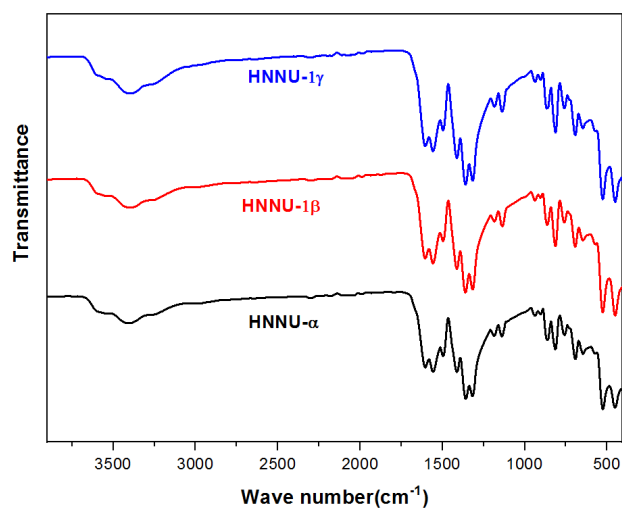

Fig. S18 FT-IR spectra of **HNNU-1 $\alpha$**  to **1 $\gamma$** .

Table S1. Crystal data and structure refinement for **HNNU-1 $\alpha$** .

|                                   |                                                                                 |                         |
|-----------------------------------|---------------------------------------------------------------------------------|-------------------------|
| Empirical formula                 | C <sub>20</sub> H <sub>26</sub> Cl <sub>4</sub> Cu <sub>2</sub> O <sub>23</sub> |                         |
| Formula weight                    | 903.31                                                                          |                         |
| Temperature                       | 293(2) K                                                                        |                         |
| Wavelength                        | 0.71073 Å                                                                       |                         |
| Crystal system                    | Triclinic                                                                       |                         |
| Space group                       | <i>P</i> $\bar{1}$                                                              |                         |
| Unit cell dimensions              | a = 7.7389(11) Å                                                                | $\alpha$ = 112.829(2)°. |
|                                   | b = 10.6086(15) Å                                                               | $\beta$ = 90.455(2)°.   |
|                                   | c = 10.6178(15) Å                                                               | $\gamma$ = 104.055(2)°. |
| Volume                            | 774.27(19) Å <sup>3</sup>                                                       |                         |
| Z                                 | 1                                                                               |                         |
| Density (calculated)              | 1.937 g/cm <sup>3</sup>                                                         |                         |
| Absorption coefficient            | 1.817 mm <sup>-1</sup>                                                          |                         |
| F(000)                            | 456                                                                             |                         |
| Crystal size                      | 0.23 x 0.22 x 0.14 mm <sup>3</sup>                                              |                         |
| Theta range for data collection   | 2.095 to 27.098°.                                                               |                         |
| Index ranges                      | -9 ≤ h ≤ 9, -12 ≤ k ≤ 13, -10 ≤ l ≤ 12                                          |                         |
| Reflections collected             | 6047                                                                            |                         |
| Independent reflections           | 3068 [R(int) = 0.0312]                                                          |                         |
| Completeness to theta = 25.242°   | 98.7 %                                                                          |                         |
| Absorption correction             | Semi-empirical from equivalents                                                 |                         |
| Max. and min. transmission        | 0.7455 and 0.6586                                                               |                         |
| Refinement method                 | Full-matrix least-squares on F <sup>2</sup>                                     |                         |
| Data / restraints / parameters    | 3068 / 0 / 227                                                                  |                         |
| Goodness-of-fit on F <sup>2</sup> | 1.064                                                                           |                         |
| Final R indices [I > 2σ(I)]       | R1 = 0.0574, wR2 = 0.1554                                                       |                         |
| R indices (all data)              | R1 = 0.0762, wR2 = 0.1677                                                       |                         |
| Largest diff. peak and hole       | 0.761 and -0.638 e.Å <sup>-3</sup>                                              |                         |

Table S2. Crystal data and structure refinement for **HNNU-1 $\beta$** .

|                                   |                                                                                 |                        |
|-----------------------------------|---------------------------------------------------------------------------------|------------------------|
| Empirical formula                 | C <sub>20</sub> H <sub>24</sub> Br <sub>2</sub> Cu <sub>2</sub> O <sub>23</sub> |                        |
| Formula weight                    | 919.29                                                                          |                        |
| Temperature                       | 101.0 K                                                                         |                        |
| Wavelength                        | 0.71073 Å                                                                       |                        |
| Crystal system                    | Triclinic                                                                       |                        |
| Space group                       | <i>P</i> $\bar{1}$                                                              |                        |
| Unit cell dimensions              | a = 7.6566(4) Å                                                                 | $\alpha$ = 67.116(2)°. |
|                                   | b = 10.5717(5) Å                                                                | $\beta$ = 89.982(2)°.  |
|                                   | c = 10.5825(5) Å                                                                | $\gamma$ = 75.517(2)°. |
| Volume                            | 759.56(7) Å <sup>3</sup>                                                        |                        |
| Z                                 | 1                                                                               |                        |
| Density (calculated)              | 2.010 g/cm <sup>3</sup>                                                         |                        |
| Absorption coefficient            | 4.128 mm <sup>-1</sup>                                                          |                        |
| F(000)                            | 456                                                                             |                        |
| Crystal size                      | 0.18 x 0.12 x 0.12 mm <sup>3</sup>                                              |                        |
| Theta range for data collection   | 2.101 to 26.407°.                                                               |                        |
| Index ranges                      | -9<=h<=9, -12<=k<=12, -11<=l<=12                                                |                        |
| Reflections collected             | 3109                                                                            |                        |
| Independent reflections           | 3109 [R(int) = 0.0856]                                                          |                        |
| Completeness to theta = 25.242°   | 99.6 %                                                                          |                        |
| Absorption correction             | Semi-empirical from equivalents                                                 |                        |
| Max. and min. transmission        | 0.745 and 0.605                                                                 |                        |
| Refinement method                 | Full-matrix least-squares on F <sup>2</sup>                                     |                        |
| Data / restraints / parameters    | 3109 / 6 / 238                                                                  |                        |
| Goodness-of-fit on F <sup>2</sup> | 1.085                                                                           |                        |
| Final R indices [I>2sigma(I)]     | R1 = 0.0807, wR2 = 0.1862                                                       |                        |
| R indices (all data)              | R1 = 0.1087, wR2 = 0.2049                                                       |                        |
| Largest diff. peak and hole       | 1.518 and -1.077 e.Å <sup>-3</sup>                                              |                        |

Table S3. Crystal data and structure refinement for **HNNU-1 $\gamma$** .

|                                   |                                                                                |                        |
|-----------------------------------|--------------------------------------------------------------------------------|------------------------|
| Empirical formula                 | C <sub>20</sub> H <sub>24</sub> Cu <sub>2</sub> I <sub>2</sub> O <sub>23</sub> |                        |
| Formula weight                    | 1013.27                                                                        |                        |
| Temperature                       | 101.0 K                                                                        |                        |
| Wavelength                        | 0.71073 Å                                                                      |                        |
| Crystal system                    | Triclinic                                                                      |                        |
| Space group                       | <i>P</i> $\bar{1}$                                                             |                        |
| Unit cell dimensions              | a = 7.6629(6) Å                                                                | $\alpha$ = 67.176(3)°. |
|                                   | b = 10.5730(9) Å                                                               | $\beta$ = 89.856(3)°.  |
|                                   | c = 10.5855(9) Å                                                               | $\gamma$ = 75.429(3)°. |
| Volume                            | 760.70(11) Å <sup>3</sup>                                                      |                        |
| Z                                 | 1                                                                              |                        |
| Density (calculated)              | 2.212 g/cm <sup>3</sup>                                                        |                        |
| Absorption coefficient            | 3.525 mm <sup>-1</sup>                                                         |                        |
| F(000)                            | 492                                                                            |                        |
| Crystal size                      | 0.14 x 0.14 x 0.13 mm <sup>3</sup>                                             |                        |
| Theta range for data collection   | 2.340 to 25.499°.                                                              |                        |
| Index ranges                      | -9 ≤ h ≤ 9, -11 ≤ k ≤ 12, -12 ≤ l ≤ 12                                         |                        |
| Reflections collected             | 5427                                                                           |                        |
| Independent reflections           | 2611 [R(int) = 0.0318]                                                         |                        |
| Completeness to theta = 25.242°   | 92.1 %                                                                         |                        |
| Absorption correction             | Semi-empirical from equivalents                                                |                        |
| Max. and min. transmission        | 0.0309 and 0.0108                                                              |                        |
| Refinement method                 | Full-matrix least-squares on F <sup>2</sup>                                    |                        |
| Data / restraints / parameters    | 2611 / 1 / 226                                                                 |                        |
| Goodness-of-fit on F <sup>2</sup> | 1.065                                                                          |                        |
| Final R indices [I > 2σ(I)]       | R1 = 0.0967, wR2 = 0.2243                                                      |                        |
| R indices (all data)              | R1 = 0.1361, wR2 = 0.2498                                                      |                        |
| Largest diff. peak and hole       | 1.310 and -1.204 e.Å <sup>-3</sup>                                             |                        |

Table S4. Selected Bond lengths [Å] and angles [°] for **HNNU-1 $\alpha$** .

---

|                     |            |
|---------------------|------------|
| Cu(1)-O(5)#1        | 1.969(4)   |
| Cu(1)-O(3)#2        | 1.995(4)   |
| Cu(1)-O(7)#3        | 1.941(4)   |
| Cu(1)-O(1)          | 1.941(4)   |
| O(5)#1-Cu(1)-O(3)#2 | 86.54(17)  |
| O(5)#1-Cu(1)-O(4)#2 | 91.88(16)  |
| O(5)#1-Cu(1)-O(6)#1 | 54.93(15)  |
| O(5)#1-Cu(1)-C(7)#1 | 27.59(17)  |
| O(5)#1-Cu(1)-C(4)#2 | 86.67(16)  |
| O(3)#2-Cu(1)-O(4)#2 | 55.71(15)  |
| O(3)#2-Cu(1)-O(6)#1 | 91.87(15)  |
| O(3)#2-Cu(1)-C(7)#1 | 87.50(16)  |
| O(3)#2-Cu(1)-C(4)#2 | 27.99(17)  |
| O(7)#3-Cu(1)-O(5)#1 | 91.41(17)  |
| O(7)#3-Cu(1)-O(3)#2 | 177.45(18) |
| O(7)#3-Cu(1)-O(4)#2 | 122.93(16) |
| O(7)#3-Cu(1)-O(1)   | 90.50(17)  |
| O(7)#3-Cu(1)-O(6)#1 | 88.17(16)  |
| O(4)#2-Cu(1)-O(6)#1 | 136.78(14) |
| O(4)#2-Cu(1)-C(4)#2 | 27.92(15)  |
| O(1)-Cu(1)-O(5)#1   | 177.15(18) |
| O(1)-Cu(1)-O(3)#2   | 91.61(17)  |
| O(1)-Cu(1)-O(4)#2   | 88.86(15)  |
| O(1)-Cu(1)-O(6)#1   | 123.04(16) |

---

Symmetry transformations used to generate equivalent atoms:

#1 x,y,z-1    #2 -x+1,-y+2,-z+1    #3 -x+1,-y+1,-z+1    #4 x,y,z+1

Table S5. Selected Bond lengths [ $\text{\AA}$ ] and angles [ $^\circ$ ] for **HNNU-1 $\beta$** .

---

|                     |          |
|---------------------|----------|
| Cu(1)-O(4)#1        | 1.980(5) |
| Cu(1)-O(7)#2        | 1.944(5) |
| Cu(1)-O(5)#3        | 1.973(5) |
| Cu(1)-O(1)          | 1.931(5) |
| O(7)#2-Cu(1)-O(4)#1 | 177.9(2) |
| O(7)#2-Cu(1)-O(5)#3 | 91.2(2)  |
| O(5)#3-Cu(1)-O(4)#1 | 86.6(2)  |
| O(1)-Cu(1)-O(4)#1   | 91.4(2)  |
| O(1)-Cu(1)-O(7)#2   | 90.7(2)  |
| O(1)-Cu(1)-O(5)#3   | 177.6(3) |

---

Symmetry transformations used to generate equivalent atoms:

#1  $-x+2, -y+2, -z+1$     #2  $-x+2, -y+1, -z+1$     #3  $x, y, z+1$     #4  $x, y, z-1$

Table S6. Selected Bond lengths [ $\text{\AA}$ ] and angles [ $^\circ$ ] for **HNNU-1 $\gamma$** .

---

|                     |          |
|---------------------|----------|
| Cu(1)-O(7)#1        | 1.934(9) |
| Cu(1)-O(5)#2        | 1.993(8) |
| Cu(1)-O(1)          | 1.943(9) |
| Cu(1)-O(4)#3        | 1.979(9) |
| O(7)#1-Cu(1)-O(5)#2 | 91.2(4)  |
| O(7)#1-Cu(1)-O(1)   | 91.5(4)  |
| O(7)#1-Cu(1)-O(4)#3 | 177.6(4) |
| O(1)-Cu(1)-O(5)#2   | 177.3(4) |
| O(1)-Cu(1)-O(4)#3   | 90.9(4)  |
| O(4)#3-Cu(1)-O(5)#2 | 86.5(4)  |

---

Symmetry transformations used to generate equivalent atoms:

#1  $-x, -y+1, -z+1$     #2  $x, y+1, z$     #3  $-x, -y+1, -z+2$     #4  $x, y-1, z$

Table S7. Hydrogen bonds for **HNNU-1 $\alpha$**  [ $\text{\AA}$  and  $^\circ$ ].

| D-H...A             | d(D-H) | d(H...A) | d(D...A) | $\angle$ (DHA) |
|---------------------|--------|----------|----------|----------------|
| O(5)-H(5)...Cl(2)   | 0.89   | 2.27     | 2.850(4) | 122.5          |
| O(2)-H(2)...Cl(2)#3 | 0.90   | 1.90     | 2.714(5) | 150.5          |
| O(4)-H(4)...O(10)   | 0.89   | 2.10     | 2.729(8) | 126.6          |
| O(9)-H(9C)...Cl(2)  | 0.98   | 2.40     | 3.040(7) | 122.3          |
| O(11)-H(11A)...O(6) | 0.96   | 2.12     | 2.674(8) | 115.1          |

Symmetry transformations used to generate equivalent atoms:

#1 x,y,z-1    #2 -x+1,-y+2,-z+1    #3 -x+1,-y+1,-z+1    #4 x,y,z+1

Table S8. Hydrogen bonds for **HNNU-1 $\beta$**  [ $\text{\AA}$  and  $^\circ$ ].

| D-H...A                | d(D-H) | d(H...A) | d(D...A)  | $\angle$ (DHA) |
|------------------------|--------|----------|-----------|----------------|
| O(8)-H(8)...Br(1)      | 0.84   | 2.38     | 3.159(6)  | 155.1          |
| O(3)-H(3)...Br(2)#5    | 0.81   | 2.40     | 2.834(6)  | 114.5          |
| O(2)-H(2)...Br(1)#6    | 0.84   | 2.16     | 2.689(6)  | 120.6          |
| O(6)-H(6)...O(9)#4     | 0.84   | 2.04     | 2.628(11) | 126.7          |
| O(6)-H(6)...O(10)      | 0.84   | 2.32     | 2.93(3)   | 130.1          |
| O(11)-H(11A)...Br(2)#6 | 0.87   | 2.21     | 2.935(8)  | 140.5          |
| O(11)-H(11B)...O(13)#6 | 0.87   | 2.10     | 2.960(17) | 172.2          |
| O(12)-H(12A)...Br(2)   | 0.87   | 1.97     | 2.698(7)  | 139.8          |
| O(12)-H(12B)...O(4)#7  | 0.87   | 2.19     | 2.989(10) | 152.7          |
| O(12)-H(12B)...O(6)#8  | 0.87   | 2.58     | 3.090(10) | 118.3          |
| O(12)-H(12C)...O(3)    | 0.90   | 1.83     | 2.703(10) | 161.5          |
| O(9)-H(9A)...Br(1)#3   | 0.87   | 1.95     | 2.703(9)  | 143.4          |
| O(9)-H(9A)...O(5)#9    | 0.87   | 2.34     | 2.932(10) | 125.7          |
| O(9)-H(9B)...O(3)#5    | 0.87   | 2.25     | 3.065(11) | 156.2          |
| O(13)-H(13A)...O(13)#8 | 0.87   | 2.37     | 3.06(3)   | 136.7          |
| O(13)-H(13B)...O(12)   | 0.87   | 2.15     | 2.756(19) | 126.0          |
| O(10)-H(10A)...Br(1)   | 0.87   | 2.32     | 2.82(3)   | 116.3          |
| O(10)-H(10B)...O(6)    | 0.87   | 2.49     | 2.93(3)   | 112.2          |
| O(10)-H(10B)...O(13)   | 0.87   | 1.83     | 2.30(4)   | 111.8          |

Symmetry transformations used to generate equivalent atoms:

#1 -x+2,-y+2,-z+1    #2 -x+2,-y+1,-z+1    #3 x,y,z+1    #4 x,y,z-1    #5 -x+1,-y+2,-z+1  
 #6 -x+1,-y+1,-z+1    #7 x-1,y,z    #8 -x+1,-y+2,-z    #9 x-1,y,z+1

Table S9. Hydrogen bonds for **HNNU-1γ** [Å and °].

| D-H...A                | d(D-H) | d(H...A) | d(D...A)  | <(DHA) |
|------------------------|--------|----------|-----------|--------|
| O(8)-H(8)...O(9)#5     | 0.83   | 2.40     | 3.023(15) | 131.7  |
| O(6)-H(6)...O(7)       | 0.81   | 2.75     | 3.148(12) | 112.3  |
| O(3)-H(3)...O(9)#6     | 0.84   | 2.70     | 3.093(14) | 110.0  |
| O(12)-H(12A)...O(2)#7  | 0.87   | 2.05     | 2.874(13) | 156.8  |
| O(9)-H(9B)...O(10)     | 0.87   | 1.90     | 2.75(2)   | 168.8  |
| O(11)-H(11A)...O(4)#8  | 0.87   | 2.05     | 2.892(13) | 161.4  |
| O(11)-H(11C)...O(6)#6  | 0.87   | 2.67     | 3.122(15) | 113.4  |
| O(10)-H(10A)...O(10)#6 | 0.87   | 2.72     | 3.13(4)   | 110.1  |

Symmetry transformations used to generate equivalent atoms:

#1 -x,-y+1,-z+1    #2 x,y+1,z    #3 -x,-y+1,-z+2    #4 x,y-1,z    #5 -x+1,-y,-z+1    #6 -  
 x+1,-y,-z+2    #7 x-1,y,z    #8 x+1,y,z

## References:

1. Bruker, *SAINT*, Bruker AXS Inc., Madison, Wisconsin, USA, 7.68 A edn., 2009.
2. Bruker, *SADABS*, Bruker AXS Inc., Madison, Wisconsin, USA, 2008/1 edn., 2008.
3. Bruker, *APEX3*, Bruker AXS Inc., Madison, Wisconsin, USA, 2014.3 - 0. edn., 2014.
4. G. M. Sheldrick, *Acta Cryst.*, 2015, **A71**, 3-8.
5. G. M. Sheldrick, *Acta Cryst.*, 2015, **C71**, 3-8.
6. O. V. Dolomanov, L. J. Bourhis, R. J. Gildea, J. A. K. Howard and H. Puschmann, *J. Appl. Cryst.*, 2009, **42**, 339-341.
